# Supplementary material
Source: PubMed Central journal article supplement (PMC4751819)
Supplement: JB.00622-15_zjb999093933so1.pdf [file JB.00622-15_zjb999093933so1.pdf]

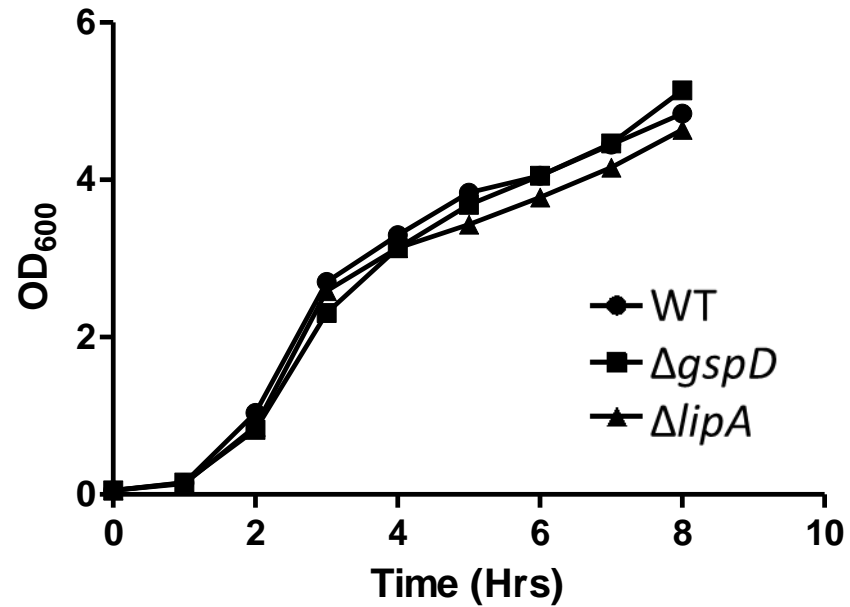

**Fig. S1. Deletion of the *lipA* and *gspD* genes has no effect on growth *in vitro*.** Overnight cultures were diluted 1:100 and grown in LB broth at 37° C. Growth was monitored over time at 600 nm.
